# Supplementary material
Source: publisher figshare collection journal article supplement (https://acs.figshare.com/ndownloader/files/3797524)
Supplement: Supplementary file 1 [file 3797524]

## Supporting Information

### Mo-V-O Based Electrocatalysts for Low Temperature Alcohol Oxidation

Adele L. Pacquette, David S. Oh and Andrew A. Gewirth\*

Department of Chemistry

University of Illinois at Urbana-Champaign

600 S. Mathews Avenue

Urbana, IL 61801 USA

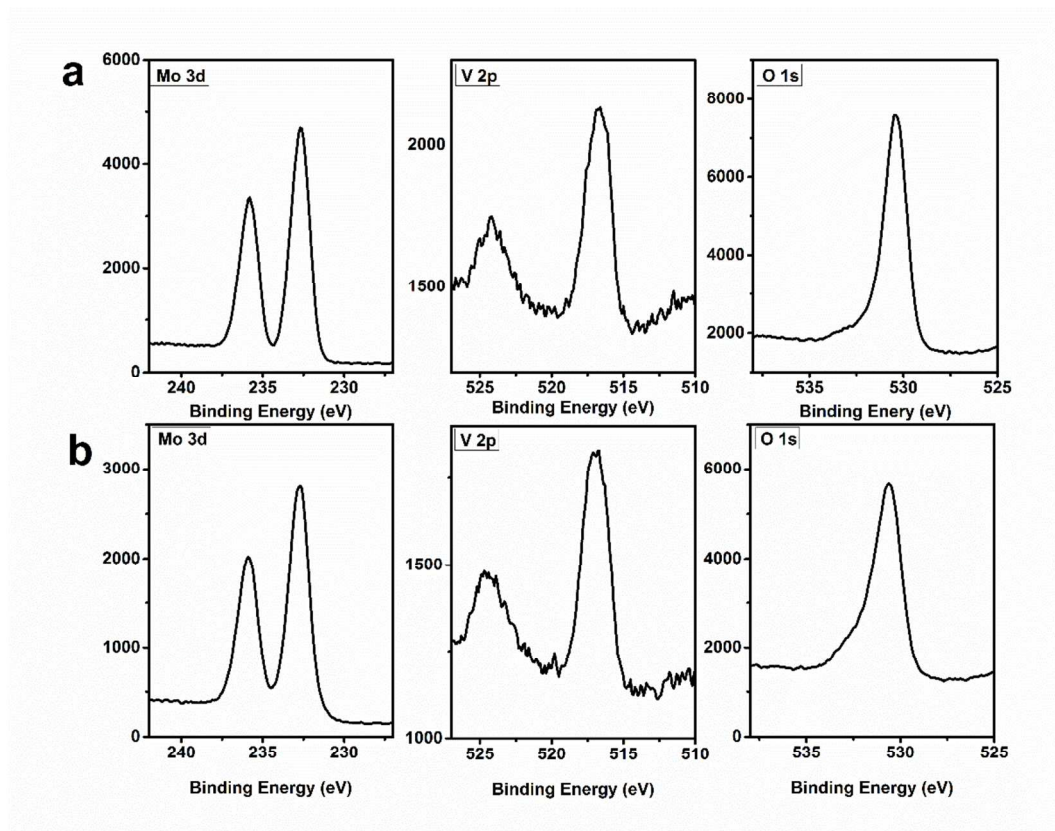

**Figure S1.** XPS (a) before calcination and (b) after calcination under nitrogen flow  $\text{Mo}_{0.97}\text{V}_{0.95}\text{O}_5$  showing Mo3d, V2p and O1s photopeaks.

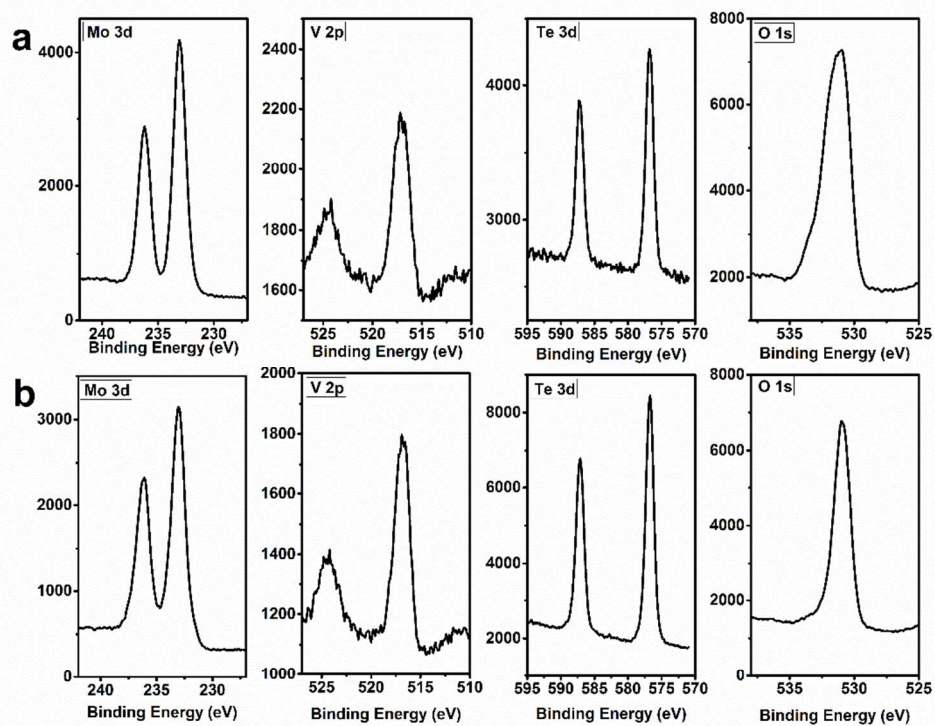

**Figure S2.** XPS (a) before calcination and (b) after calcination under nitrogen flow  $\text{TeO}_{0.33}\text{Mo}_{0.75}\text{V}_{0.25}\text{O}_x$  (b) showing Mo3d, V2p, Te3d and O1s photopeaks.

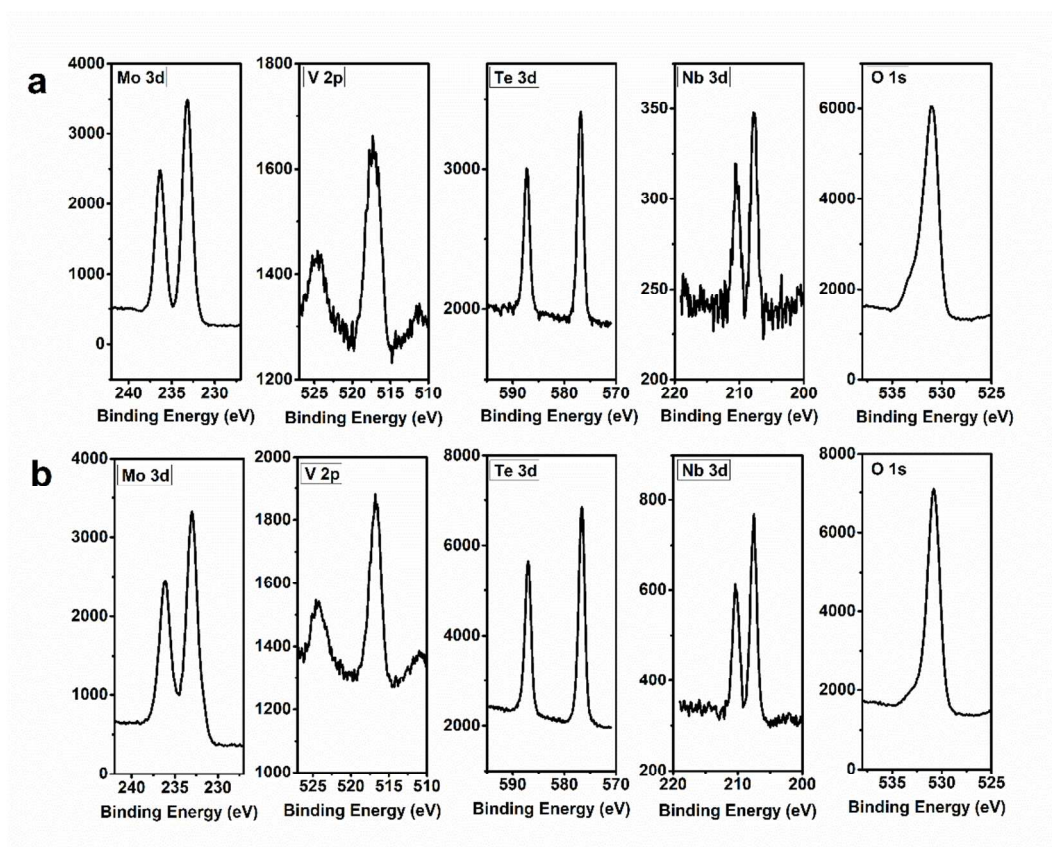

**Figure S3.** XPS (a) before calcination and after (b) calcination under nitrogen flow  $(\text{TeO})_{0.39}(\text{Mo}_{3.52}\text{V}_{1.06}\text{Nb}_{0.42})\text{O}_{14}$  showing Mo3d, V2p, Te3d, Nb3d and O1s photopeaks.

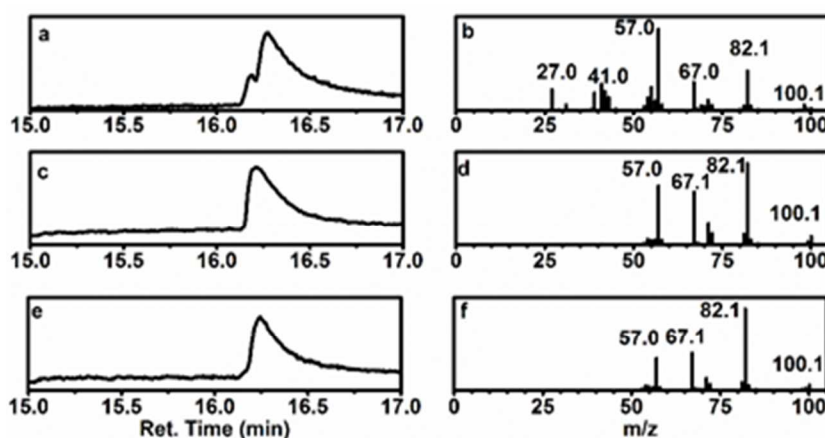

**Figure S4.** GCMS analysis of 0.5 M  $\text{H}_2\text{SO}_4$ /0.15 M  $\text{C}_6\text{H}_{11}\text{OH}$  blank (a,b) and solutions after cyclic voltammetry studies in 0.5 M  $\text{H}_2\text{SO}_4$ /0.15 M  $\text{C}_6\text{H}_{11}\text{OH}$  for Vulcan XC-72 at 25 °C (c,d), 40 °C and 60 °C (e,f) showing cyclohexanol with 100 m/z.

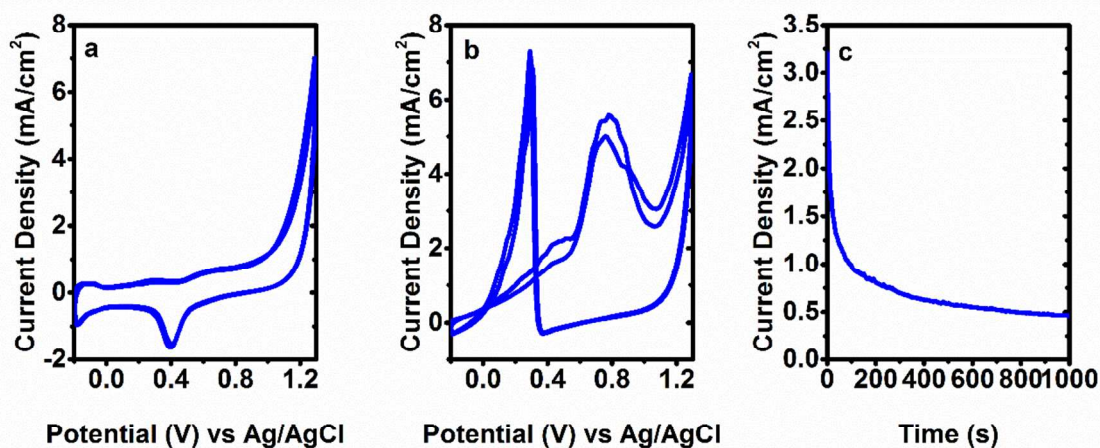

**Figure S5.** Cyclic voltammetry curves of ETEK-Pt in (a) 0.5 M H<sub>2</sub>SO<sub>4</sub> and (b) 0.5 M H<sub>2</sub>SO<sub>4</sub>/0.15 M C<sub>6</sub>H<sub>11</sub>OH at 60 °C. Scan rate 10 mVs<sup>-1</sup>. (c) Chronoamperometric curve of ETEK-Pt at 0.7 V in 0.5 M H<sub>2</sub>SO<sub>4</sub>/0.15 M C<sub>6</sub>H<sub>11</sub>OH.
